# Supplementary material for: Gene expression profiles of specific chicken skeletal muscles
Source: PubMed Central journal article supplement (PMC9458719; doi:10.1038/s41597-022-01668-w), 2022-09-08
Supplement: 41597_2022_1668_MOESM1_ESM.pdf [file 41597_2022_1668_MOESM1_ESM.pdf]

## Supplementary Information

### Supplementary Information Table of Contents

**Supplementary Table 1** Sequencing data summary of RNA-seq for all 58 samples.

**Supplementary Table 2** The weight of chickens.

**Supplementary Table 3** The muscle weight to body weight ratio of individual skeletal muscles.

**Supplementary Table 4** The top 1% highly expressed genes at each skeletal muscle.

**Supplementary Table 1** Sequencing data summary of RNA-seq for all 58 samples

| <b>Sample ID</b>       | <b>Clean Reads (Mb)</b> | <b>Clean Base (Gb)</b> | <b>Q30(%)</b> |
|------------------------|-------------------------|------------------------|---------------|
| Extraocular_1          | 48.4                    | 7.2                    | 93.37         |
| Extraocular_4          | 45.2                    | 6.7                    | 93.12         |
| Extraocular_5          | 53.4                    | 8                      | 92.81         |
| Extraocular_6          | 52.6                    | 7.8                    | 93.53         |
| Longissimus dorsi_1    | 55.7                    | 8.3                    | 92.97         |
| Longissimus dorsi_2    | 46.8                    | 7                      | 93.02         |
| Longissimus dorsi_3    | 48.7                    | 7.3                    | 93.31         |
| Longissimus dorsi_4    | 48.3                    | 7.2                    | 92.85         |
| Longissimus dorsi_5    | 48.8                    | 7.3                    | 92.87         |
| Longissimus dorsi_6    | 46.1                    | 6.9                    | 92.52         |
| Pectoralis thoracica_1 | 49.4                    | 7.4                    | 92.8          |
| Pectoralis thoracica_2 | 48.4                    | 7.2                    | 92.84         |
| Pectoralis thoracica_3 | 48.6                    | 7.2                    | 92.83         |
| Pectoralis thoracica_4 | 48.4                    | 7.2                    | 92.83         |
| Pectoralis thoracica_5 | 47.4                    | 7.1                    | 93.07         |
| Pectoralis thoracica_6 | 47.3                    | 7.3                    | 93.5          |
| Quadratus lumborum_1   | 49.6                    | 7.4                    | 93.23         |
| Quadratus lumborum_2   | 48                      | 7.2                    | 92.65         |
| Quadratus lumborum_3   | 52.3                    | 7.8                    | 92.45         |
| Quadratus lumborum_4   | 49                      | 7.3                    | 93.18         |
| Quadratus lumborum_5   | 48.3                    | 7.2                    | 92.77         |
| Quadratus lumborum_6   | 49.8                    | 7.4                    | 92.84         |
| Quadriceps_1           | 49.5                    | 7.4                    | 92.81         |
| Quadriceps_2           | 44.7                    | 6.7                    | 92.34         |
| Quadriceps_3           | 50.5                    | 7.5                    | 92.78         |
| Quadriceps_4           | 47.3                    | 7.1                    | 92.92         |
| Quadriceps_5           | 48.2                    | 7.2                    | 92.95         |
| Quadriceps_6           | 50.9                    | 7.6                    | 92.85         |
| Tibialis anterior_1    | 46.4                    | 6.9                    | 93.21         |
| Tibialis anterior_2    | 46                      | 6.9                    | 92.99         |
| Tibialis anterior_3    | 50.6                    | 7.5                    | 92.78         |
| Tibialis anterior_4    | 50                      | 7.5                    | 93.13         |
| Tibialis anterior_5    | 51.3                    | 7.6                    | 92.55         |
| Tibialis anterior_6    | 47.3                    | 7.1                    | 92.74         |
| Gastrocnemius_1        | 47.2                    | 7                      | 92.32         |
| Gastrocnemius_2        | 49.1                    | 7.3                    | 92.38         |
| Gastrocnemius_3        | 49.3                    | 7.4                    | 92.32         |
| Gastrocnemius_4        | 50.1                    | 7.5                    | 92.86         |
| Gastrocnemius_5        | 52.6                    | 7.8                    | 92.94         |

*Continued on next page*

**Supplementary Table 1** (*continued*) Sequencing data summary of RNA-seq for all 58 samples

| <b>Sample ID</b>             | <b>Clean Reads (Mb)</b> | <b>Clean Base (Gb)</b> | <b>Q30(%)</b> |
|------------------------------|-------------------------|------------------------|---------------|
| Gastrocnemius_6              | 51.5                    | 7.7                    | 92.87         |
| Soleus_1                     | 49                      | 7.3                    | 93.5          |
| Soleus_2                     | 49.2                    | 7.3                    | 91.53         |
| Soleus_3                     | 48.6                    | 7.2                    | 92.85         |
| Soleus_4                     | 52.3                    | 7.8                    | 93.17         |
| Soleus_5                     | 49.3                    | 7.3                    | 93.04         |
| Soleus_6                     | 50.1                    | 7.5                    | 93.09         |
| Extensor digitorum longus _1 | 47.5                    | 7.1                    | 92.99         |
| Extensor digitorum longus _2 | 43                      | 6.4                    | 92.39         |
| Extensor digitorum longus _3 | 51.3                    | 7.7                    | 93.41         |
| Extensor digitorum longus _4 | 53.1                    | 7.9                    | 91.94         |
| Extensor digitorum longus _5 | 49.2                    | 7.3                    | 93.17         |
| Extensor digitorum longus _6 | 49.7                    | 7.4                    | 92.76         |
| Flexor digitorum brevis _1   | 52.8                    | 7.9                    | 93.05         |
| Flexor digitorum brevis _2   | 51.3                    | 7.7                    | 93.09         |
| Flexor digitorum brevis _3   | 46.6                    | 6.9                    | 92.96         |
| Flexor digitorum brevis _4   | 49.9                    | 7.4                    | 93.01         |
| Flexor digitorum brevis _5   | 49.1                    | 7.3                    | 92.87         |
| Flexor digitorum brevis _6   | 48.4                    | 7.2                    | 93.18         |

**Supplementary Table 2** The weight of chickens

| <b>Sample name</b> | <b>Body weight (kg)</b> |
|--------------------|-------------------------|
| Chicken_1          | 2785.00                 |
| Chicken_2          | 2590.00                 |
| Chicken_3          | 2700.00                 |
| Chicken_4          | 2860.00                 |
| Chicken_5          | 3085.00                 |
| Chicken_6          | 3060.00                 |

**Supplementary Table 3** The muscle weight to body weight ratio of individual skeletal muscles

|                                  | Muscle weight (g) |           |           |           |           |           | Muscle weight/Body weight (%) | Standard Deviation |
|----------------------------------|-------------------|-----------|-----------|-----------|-----------|-----------|-------------------------------|--------------------|
|                                  | Chicken_1         | Chicken_2 | Chicken_3 | Chicken_4 | Chicken_5 | Chicken_6 |                               |                    |
| <b>Extraocular</b>               | 0.04              | 0.33      | 0.04      | 0.04      | 0.05      | 0.04      | 0.003317332                   | 0.004583413        |
| <b>Longissimus dorsi</b>         | 4.46              | 3.26      | 3.24      | 4.20      | 4.22      | 3.76      | 0.13542204                    | 0.01568575         |
| <b>Pectoralis thoracica</b>      | 410.00            | 350.00    | 310.00    | 346.62    | 361.10    | 410.00    | 12.82333601                   | 1.261564277        |
| <b>Quadratus lumborum</b>        | 18.54             | 18.36     | 16.56     | 19.80     | 21.86     | 23.42     | 0.69236332                    | 0.050637417        |
| <b>Quadriceps</b>                | 53.04             | 39.38     | 42.94     | 38.52     | 44.70     | 46.70     | 1.556210912                   | 0.189727318        |
| <b>Tibialis anterior</b>         | 26.28             | 22.34     | 23.06     | 25.72     | 26.74     | 26.58     | 0.882491962                   | 0.033658752        |
| <b>Gastrocnemius</b>             | 10.64             | 25.94     | 24.36     | 28.12     | 29.18     | 30.66     | 0.869476328                   | 0.241837344        |
| <b>Soleus</b>                    | 5.54              | 5.42      | 5.52      | 3.54      | 6.52      | 5.78      | 0.189440664                   | 0.03316663         |
| <b>Extensor digitorum longus</b> | 0.38              | 0.50      | 0.84      | 0.62      | 1.10      | 0.64      | 0.023718402                   | 0.008125882        |

**Supplementary Table 4** The top 1% highly expressed genes at each skeletal muscle

| <b>Extraocular</b> | <b>Longissimus dorsi</b> | <b>Pectoralis thoracica</b> | <b>Quadratus lumborum</b> | <b>Quadriceps</b> | <b>Tibialis anterior</b> | <b>Gastrocnemius</b> | <b>Soleus</b>     | <b>Extensor digitorum longus</b> | <b>Flexor digitorum brevis</b> |
|--------------------|--------------------------|-----------------------------|---------------------------|-------------------|--------------------------|----------------------|-------------------|----------------------------------|--------------------------------|
| ENSGALG0000000313  | ENSGALG0000000474        | ENSGALG0000000295           | ENSGALG0000000313         | ENSGALG0000000313 | ENSGALG0000000313        | ENSGALG0000000313    | ENSGALG0000000474 | ENSGALG0000000313                | ENSGALG0000000313              |
| ENSGALG0000000474  | ENSGALG0000000812        | ENSGALG0000000474           | ENSGALG0000000474         | ENSGALG0000000474 | ENSGALG0000000474        | ENSGALG0000000474    | ENSGALG0000000812 | ENSGALG0000000474                | ENSGALG0000000474              |
| ENSGALG0000000812  | ENSGALG0000001096        | ENSGALG0000000812           | ENSGALG0000000812         | ENSGALG0000000812 | ENSGALG0000000812        | ENSGALG0000000812    | ENSGALG0000001096 | ENSGALG0000000812                | ENSGALG0000000812              |
| ENSGALG0000001096  | ENSGALG0000001446        | ENSGALG0000001096           | ENSGALG0000001096         | ENSGALG0000001096 | ENSGALG0000001096        | ENSGALG0000001096    | ENSGALG0000001330 | ENSGALG0000001446                | ENSGALG0000001096              |
| ENSGALG0000001330  | ENSGALG0000001465        | ENSGALG0000001446           | ENSGALG0000001330         | ENSGALG0000001330 | ENSGALG0000001446        | ENSGALG0000001330    | ENSGALG0000001465 | ENSGALG0000001459                | ENSGALG0000001446              |
| ENSGALG0000001446  | ENSGALG0000001564        | ENSGALG0000001459           | ENSGALG0000001446         | ENSGALG0000001446 | ENSGALG0000001465        | ENSGALG0000001446    | ENSGALG0000001564 | ENSGALG0000001465                | ENSGALG0000001459              |
| ENSGALG0000001465  | ENSGALG0000001634        | ENSGALG0000001465           | ENSGALG0000001459         | ENSGALG0000001459 | ENSGALG0000001634        | ENSGALG0000001459    | ENSGALG0000001634 | ENSGALG0000001634                | ENSGALG0000001465              |
| ENSGALG0000001634  | ENSGALG0000001793        | ENSGALG0000001634           | ENSGALG0000001465         | ENSGALG0000001465 | ENSGALG0000001658        | ENSGALG0000001465    | ENSGALG0000001658 | ENSGALG0000001658                | ENSGALG0000001634              |
| ENSGALG0000001658  | ENSGALG0000001926        | ENSGALG0000001658           | ENSGALG0000001634         | ENSGALG0000001634 | ENSGALG0000001709        | ENSGALG0000001634    | ENSGALG0000001926 | ENSGALG0000001709                | ENSGALG0000001658              |
| ENSGALG0000001793  | ENSGALG0000001977        | ENSGALG0000001709           | ENSGALG0000001658         | ENSGALG0000001658 | ENSGALG0000001793        | ENSGALG0000001658    | ENSGALG0000001977 | ENSGALG0000001793                | ENSGALG0000001709              |
| ENSGALG0000002157  | ENSGALG0000001992        | ENSGALG0000001926           | ENSGALG0000001709         | ENSGALG0000001709 | ENSGALG0000001926        | ENSGALG0000001709    | ENSGALG0000001992 | ENSGALG0000001926                | ENSGALG0000001793              |
| ENSGALG0000002160  | ENSGALG0000002160        | ENSGALG0000001977           | ENSGALG0000001793         | ENSGALG0000001793 | ENSGALG0000001977        | ENSGALG0000001793    | ENSGALG0000002160 | ENSGALG0000001977                | ENSGALG0000001926              |

*Continued on next page*

**Supplementary Table 4** (*continued*) The top 1% highly expressed genes at each skeletal muscle

| Extraocular        | Longissimus dorsi  | Pectoralis thoracica | Quadratus lumborum | Quadriceps         | Tibialis anterior  | Gastrocnemius      | Soleus             | Extensor digitorum longus | Flexor digitorum brevis |
|--------------------|--------------------|----------------------|--------------------|--------------------|--------------------|--------------------|--------------------|---------------------------|-------------------------|
| ENSGALG00000002813 | ENSGALG00000002813 | ENSGALG00000001992   | ENSGALG00000001926 | ENSGALG00000001926 | ENSGALG00000001992 | ENSGALG00000001926 | ENSGALG00000002495 | ENSGALG00000001992        | ENSGALG00000001992      |
| ENSGALG00000002837 | ENSGALG00000002868 | ENSGALG00000002157   | ENSGALG00000001977 | ENSGALG00000001977 | ENSGALG00000002157 | ENSGALG00000001977 | ENSGALG00000002813 | ENSGALG00000002157        | ENSGALG00000002157      |
| ENSGALG00000002868 | ENSGALG00000002907 | ENSGALG00000002160   | ENSGALG00000001992 | ENSGALG00000001992 | ENSGALG00000002160 | ENSGALG00000001992 | ENSGALG00000002837 | ENSGALG00000002160        | ENSGALG00000002160      |
| ENSGALG00000002907 | ENSGALG00000003197 | ENSGALG00000002813   | ENSGALG00000002157 | ENSGALG00000002160 | ENSGALG00000002813 | ENSGALG00000002157 | ENSGALG00000002868 | ENSGALG00000002813        | ENSGALG00000002771      |
| ENSGALG00000003197 | ENSGALG00000003226 | ENSGALG00000002868   | ENSGALG00000002160 | ENSGALG00000002813 | ENSGALG00000002837 | ENSGALG00000002160 | ENSGALG00000002907 | ENSGALG00000002837        | ENSGALG00000002813      |
| ENSGALG00000003521 | ENSGALG00000003521 | ENSGALG00000002907   | ENSGALG00000002813 | ENSGALG00000002837 | ENSGALG00000002868 | ENSGALG00000002813 | ENSGALG00000003197 | ENSGALG00000002868        | ENSGALG00000002837      |
| ENSGALG00000003966 | ENSGALG00000003778 | ENSGALG00000003197   | ENSGALG00000002837 | ENSGALG00000002868 | ENSGALG00000002907 | ENSGALG00000002837 | ENSGALG00000003226 | ENSGALG00000002907        | ENSGALG00000002868      |
| ENSGALG00000004107 | ENSGALG00000003966 | ENSGALG00000003521   | ENSGALG00000002868 | ENSGALG00000002907 | ENSGALG00000003197 | ENSGALG00000002868 | ENSGALG00000003521 | ENSGALG00000003015        | ENSGALG00000002907      |
| ENSGALG00000004184 | ENSGALG00000004509 | ENSGALG00000003966   | ENSGALG00000002907 | ENSGALG00000003197 | ENSGALG00000003226 | ENSGALG00000002907 | ENSGALG00000003966 | ENSGALG00000003197        | ENSGALG00000003015      |
| ENSGALG00000004509 | ENSGALG00000004521 | ENSGALG00000004509   | ENSGALG00000003197 | ENSGALG00000003226 | ENSGALG00000003521 | ENSGALG00000003197 | ENSGALG00000004509 | ENSGALG00000003226        | ENSGALG00000003197      |
| ENSGALG00000004521 | ENSGALG00000004818 | ENSGALG00000004521   | ENSGALG00000003521 | ENSGALG00000003521 | ENSGALG00000003966 | ENSGALG00000003521 | ENSGALG00000004521 | ENSGALG00000003521        | ENSGALG00000003226      |
| ENSGALG00000004582 | ENSGALG00000004848 | ENSGALG00000004818   | ENSGALG00000003966 | ENSGALG00000003966 | ENSGALG00000004184 | ENSGALG00000003966 | ENSGALG00000004818 | ENSGALG00000003966        | ENSGALG00000003283      |
| ENSGALG00000004594 | ENSGALG00000004871 | ENSGALG00000004848   | ENSGALG00000004184 | ENSGALG00000004184 | ENSGALG00000004509 | ENSGALG00000004044 | ENSGALG00000004848 | ENSGALG00000004044        | ENSGALG00000003521      |

*Continued on next page*

**Supplementary Table 4** (continued) The top 1% highly expressed genes at each skeletal muscle

| <b>Extraocular</b>     | <b>Longissimus dorsi</b> | <b>Pectoralis thoracica</b> | <b>Quadratus lumborum</b> | <b>Quadriceps</b>      | <b>Tibialis anterior</b> | <b>Gastrocnemius</b>   | <b>Soleus</b>          | <b>Extensor digitorum longus</b> | <b>Flexor digitorum brevis</b> |
|------------------------|--------------------------|-----------------------------|---------------------------|------------------------|--------------------------|------------------------|------------------------|----------------------------------|--------------------------------|
| ENSGALG000<br>00004818 | ENSGALG000<br>00004952   | ENSGALG000<br>00004871      | ENSGALG000<br>00004509    | ENSGALG000<br>00004509 | ENSGALG000<br>00004521   | ENSGALG000<br>00004184 | ENSGALG000<br>00004871 | ENSGALG000<br>00004184           | ENSGALG000<br>00003966         |
| ENSGALG000<br>00004871 | ENSGALG000<br>00004956   | ENSGALG000<br>00004952      | ENSGALG000<br>00004521    | ENSGALG000<br>00004521 | ENSGALG000<br>00004818   | ENSGALG000<br>00004509 | ENSGALG000<br>00004952 | ENSGALG000<br>00004509           | ENSGALG000<br>00004107         |
| ENSGALG000<br>00004952 | ENSGALG000<br>00005002   | ENSGALG000<br>00004956      | ENSGALG000<br>00004818    | ENSGALG000<br>00004818 | ENSGALG000<br>00004848   | ENSGALG000<br>00004521 | ENSGALG000<br>00004956 | ENSGALG000<br>00004521           | ENSGALG000<br>00004184         |
| ENSGALG000<br>00005349 | ENSGALG000<br>00005226   | ENSGALG000<br>00005002      | ENSGALG000<br>00004848    | ENSGALG000<br>00004848 | ENSGALG000<br>00004871   | ENSGALG000<br>00004594 | ENSGALG000<br>00005002 | ENSGALG000<br>00004594           | ENSGALG000<br>00004509         |
| ENSGALG000<br>00005490 | ENSGALG000<br>00005407   | ENSGALG000<br>00005226      | ENSGALG000<br>00004871    | ENSGALG000<br>00004871 | ENSGALG000<br>00004952   | ENSGALG000<br>00004818 | ENSGALG000<br>00005226 | ENSGALG000<br>00004818           | ENSGALG000<br>00004521         |
| ENSGALG000<br>00005749 | ENSGALG000<br>00005458   | ENSGALG000<br>00005407      | ENSGALG000<br>00004952    | ENSGALG000<br>00004952 | ENSGALG000<br>00004956   | ENSGALG000<br>00004848 | ENSGALG000<br>00005490 | ENSGALG000<br>00004848           | ENSGALG000<br>00004594         |
| ENSGALG000<br>00005843 | ENSGALG000<br>00005490   | ENSGALG000<br>00005458      | ENSGALG000<br>00005002    | ENSGALG000<br>00005002 | ENSGALG000<br>00005002   | ENSGALG000<br>00004871 | ENSGALG000<br>00005749 | ENSGALG000<br>00004871           | ENSGALG000<br>00004818         |
| ENSGALG000<br>00005922 | ENSGALG000<br>00005587   | ENSGALG000<br>00005490      | ENSGALG000<br>00005226    | ENSGALG000<br>00005226 | ENSGALG000<br>00005226   | ENSGALG000<br>00004952 | ENSGALG000<br>00005843 | ENSGALG000<br>00004952           | ENSGALG000<br>00004848         |
| ENSGALG000<br>00005948 | ENSGALG000<br>00005749   | ENSGALG000<br>00005587      | ENSGALG000<br>00005448    | ENSGALG000<br>00005448 | ENSGALG000<br>00005448   | ENSGALG000<br>00005002 | ENSGALG000<br>00005849 | ENSGALG000<br>00005226           | ENSGALG000<br>00004871         |
| ENSGALG000<br>00006179 | ENSGALG000<br>00005843   | ENSGALG000<br>00005749      | ENSGALG000<br>00005490    | ENSGALG000<br>00005490 | ENSGALG000<br>00005490   | ENSGALG000<br>00005226 | ENSGALG000<br>00005922 | ENSGALG000<br>00005448           | ENSGALG000<br>00004952         |
| ENSGALG000<br>00006572 | ENSGALG000<br>00005922   | ENSGALG000<br>00005843      | ENSGALG000<br>00005749    | ENSGALG000<br>00005749 | ENSGALG000<br>00005749   | ENSGALG000<br>00005448 | ENSGALG000<br>00005948 | ENSGALG000<br>00005490           | ENSGALG000<br>00005226         |
| ENSGALG000<br>00006591 | ENSGALG000<br>00005948   | ENSGALG000<br>00005922      | ENSGALG000<br>00005843    | ENSGALG000<br>00005843 | ENSGALG000<br>00005843   | ENSGALG000<br>00005490 | ENSGALG000<br>00006069 | ENSGALG000<br>00005749           | ENSGALG000<br>00005448         |
| ENSGALG000<br>00006835 | ENSGALG000<br>00006069   | ENSGALG000<br>00005948      | ENSGALG000<br>00005849    | ENSGALG000<br>00005849 | ENSGALG000<br>00005849   | ENSGALG000<br>00005749 | ENSGALG000<br>00006179 | ENSGALG000<br>00005843           | ENSGALG000<br>00005490         |

Continued on next page



**Supplementary Table 4** (*continued*) The top 1% highly expressed genes at each skeletal muscle

| Extraocular        | Longissimus dorsi  | Pectoralis thoracica | Quadratus lumborum | Quadriceps         | Tibialis anterior  | Gastrocnemius      | Soleus             | Extensor digitorum longus | Flexor digitorum brevis |
|--------------------|--------------------|----------------------|--------------------|--------------------|--------------------|--------------------|--------------------|---------------------------|-------------------------|
| ENSGALG00000007114 | ENSGALG00000006179 | ENSGALG00000006179   | ENSGALG00000005922 | ENSGALG00000005922 | ENSGALG00000005922 | ENSGALG00000005843 | ENSGALG00000006190 | ENSGALG00000005849        | ENSGALG00000005749      |
| ENSGALG00000007205 | ENSGALG00000006190 | ENSGALG00000006300   | ENSGALG00000005948 | ENSGALG00000005948 | ENSGALG00000005948 | ENSGALG00000005849 | ENSGALG00000006300 | ENSGALG00000005922        | ENSGALG00000005843      |
| ENSGALG00000007220 | ENSGALG00000006300 | ENSGALG00000006572   | ENSGALG00000006179 | ENSGALG00000006179 | ENSGALG00000006069 | ENSGALG00000005922 | ENSGALG00000006572 | ENSGALG00000005948        | ENSGALG00000005849      |
| ENSGALG00000007699 | ENSGALG00000006572 | ENSGALG00000006591   | ENSGALG00000006190 | ENSGALG00000006190 | ENSGALG00000006179 | ENSGALG00000005948 | ENSGALG00000006591 | ENSGALG00000006179        | ENSGALG00000005922      |
| ENSGALG00000007863 | ENSGALG00000006591 | ENSGALG00000006835   | ENSGALG00000006300 | ENSGALG00000006300 | ENSGALG00000006190 | ENSGALG00000006179 | ENSGALG00000006835 | ENSGALG00000006190        | ENSGALG00000005948      |
| ENSGALG00000008620 | ENSGALG00000006835 | ENSGALG00000007114   | ENSGALG00000006572 | ENSGALG00000006572 | ENSGALG00000006300 | ENSGALG00000006190 | ENSGALG00000007114 | ENSGALG00000006300        | ENSGALG00000006179      |
| ENSGALG00000009844 | ENSGALG00000007114 | ENSGALG00000007220   | ENSGALG00000006591 | ENSGALG00000006591 | ENSGALG00000006572 | ENSGALG00000006300 | ENSGALG00000007220 | ENSGALG00000006572        | ENSGALG00000006190      |
| ENSGALG00000009963 | ENSGALG00000007220 | ENSGALG00000007606   | ENSGALG00000006835 | ENSGALG00000006753 | ENSGALG00000006591 | ENSGALG00000006572 | ENSGALG00000007606 | ENSGALG00000006591        | ENSGALG00000006300      |
| ENSGALG00000010023 | ENSGALG00000007606 | ENSGALG00000007699   | ENSGALG00000007114 | ENSGALG00000006835 | ENSGALG00000006835 | ENSGALG00000006591 | ENSGALG00000007699 | ENSGALG00000006835        | ENSGALG00000006572      |
| ENSGALG00000010077 | ENSGALG00000007699 | ENSGALG00000007863   | ENSGALG00000007220 | ENSGALG00000007114 | ENSGALG00000007114 | ENSGALG00000006835 | ENSGALG00000007863 | ENSGALG00000007114        | ENSGALG00000006591      |
| ENSGALG00000010124 | ENSGALG00000007863 | ENSGALG00000007936   | ENSGALG00000007606 | ENSGALG00000007205 | ENSGALG00000007220 | ENSGALG00000007114 | ENSGALG00000007936 | ENSGALG00000007220        | ENSGALG00000006835      |
| ENSGALG00000010614 | ENSGALG00000007936 | ENSGALG00000008066   | ENSGALG00000007699 | ENSGALG00000007220 | ENSGALG00000007606 | ENSGALG00000007205 | ENSGALG00000008066 | ENSGALG00000007383        | ENSGALG00000007114      |
| ENSGALG00000011086 | ENSGALG00000008066 | ENSGALG00000008620   | ENSGALG00000007863 | ENSGALG00000007606 | ENSGALG00000007699 | ENSGALG00000007220 | ENSGALG00000008620 | ENSGALG00000007606        | ENSGALG00000007205      |

*Continued on next page*

**Supplementary Table 4** (continued) The top 1% highly expressed genes at each skeletal muscle

| Extraocular        | Longissimus dorsi  | Pectoralis thoracica | Quadratus lumborum | Quadriceps         | Tibialis anterior  | Gastrocnemius      | Soleus             | Extensor digitorum longus | Flexor digitorum brevis |
|--------------------|--------------------|----------------------|--------------------|--------------------|--------------------|--------------------|--------------------|---------------------------|-------------------------|
| ENSGALG00000011475 | ENSGALG00000008620 | ENSGALG00000008677   | ENSGALG00000007936 | ENSGALG00000007699 | ENSGALG00000007863 | ENSGALG00000007539 | ENSGALG00000008684 | ENSGALG00000007699        | ENSGALG00000007220      |
| ENSGALG00000011483 | ENSGALG00000008684 | ENSGALG00000008684   | ENSGALG00000008066 | ENSGALG00000007863 | ENSGALG00000007936 | ENSGALG00000007699 | ENSGALG00000009076 | ENSGALG00000007863        | ENSGALG00000007611      |
| ENSGALG00000011551 | ENSGALG00000009654 | ENSGALG00000009844   | ENSGALG00000008620 | ENSGALG00000007936 | ENSGALG00000008066 | ENSGALG00000007863 | ENSGALG00000010023 | ENSGALG00000008620        | ENSGALG00000007699      |
| ENSGALG00000011740 | ENSGALG00000010023 | ENSGALG00000010023   | ENSGALG00000008684 | ENSGALG00000008066 | ENSGALG00000008620 | ENSGALG00000008066 | ENSGALG00000010027 | ENSGALG00000008684        | ENSGALG00000007863      |
| ENSGALG00000012229 | ENSGALG00000010027 | ENSGALG00000010027   | ENSGALG00000010023 | ENSGALG00000008620 | ENSGALG00000008684 | ENSGALG00000008620 | ENSGALG00000010077 | ENSGALG00000008945        | ENSGALG00000008066      |
| ENSGALG00000012522 | ENSGALG00000010077 | ENSGALG00000010077   | ENSGALG00000010027 | ENSGALG00000008684 | ENSGALG00000010023 | ENSGALG00000008684 | ENSGALG00000010124 | ENSGALG00000009621        | ENSGALG00000008620      |
| ENSGALG00000012783 | ENSGALG00000010124 | ENSGALG00000010124   | ENSGALG00000010077 | ENSGALG00000009076 | ENSGALG00000010027 | ENSGALG00000008805 | ENSGALG00000010614 | ENSGALG00000009641        | ENSGALG00000008677      |
| ENSGALG00000013537 | ENSGALG00000010614 | ENSGALG00000010614   | ENSGALG00000010124 | ENSGALG00000010023 | ENSGALG00000010077 | ENSGALG00000009076 | ENSGALG00000011016 | ENSGALG00000010023        | ENSGALG00000008684      |
| ENSGALG00000013990 | ENSGALG00000011016 | ENSGALG00000011016   | ENSGALG00000010614 | ENSGALG00000010027 | ENSGALG00000010124 | ENSGALG00000010023 | ENSGALG00000011086 | ENSGALG00000010027        | ENSGALG00000008806      |
| ENSGALG00000014432 | ENSGALG00000011086 | ENSGALG00000011086   | ENSGALG00000011016 | ENSGALG00000010077 | ENSGALG00000010614 | ENSGALG00000010027 | ENSGALG00000011306 | ENSGALG00000010077        | ENSGALG00000009621      |
| ENSGALG00000014442 | ENSGALG00000011306 | ENSGALG00000011290   | ENSGALG00000011086 | ENSGALG00000010124 | ENSGALG00000011016 | ENSGALG00000010077 | ENSGALG00000011475 | ENSGALG00000010124        | ENSGALG00000009641      |
| ENSGALG00000014833 | ENSGALG00000011475 | ENSGALG00000011306   | ENSGALG00000011290 | ENSGALG00000010614 | ENSGALG00000011086 | ENSGALG00000010124 | ENSGALG00000011483 | ENSGALG00000010614        | ENSGALG00000010023      |
| ENSGALG00000015082 | ENSGALG00000011483 | ENSGALG00000011475   | ENSGALG00000011306 | ENSGALG00000011086 | ENSGALG00000011306 | ENSGALG00000010614 | ENSGALG00000011715 | ENSGALG00000011016        | ENSGALG00000010027      |

Continued on next page

**Supplementary Table 4** (*continued*) The top 1% highly expressed genes at each skeletal muscle

| Extraocular        | Longissimus dorsi  | Pectoralis thoracica | Quadratus lumborum | Quadriceps         | Tibialis anterior  | Gastrocnemius      | Soleus             | Extensor digitorum longus | Flexor digitorum brevis |
|--------------------|--------------------|----------------------|--------------------|--------------------|--------------------|--------------------|--------------------|---------------------------|-------------------------|
| ENSGALG00000015195 | ENSGALG00000011715 | ENSGALG00000011483   | ENSGALG00000011475 | ENSGALG00000011306 | ENSGALG00000011475 | ENSGALG00000011086 | ENSGALG00000012211 | ENSGALG00000011086        | ENSGALG00000010077      |
| ENSGALG00000015339 | ENSGALG00000012211 | ENSGALG00000012211   | ENSGALG00000011483 | ENSGALG00000011475 | ENSGALG00000011483 | ENSGALG00000011290 | ENSGALG00000012229 | ENSGALG00000011274        | ENSGALG00000010124      |
| ENSGALG00000015372 | ENSGALG00000012229 | ENSGALG00000012229   | ENSGALG00000011715 | ENSGALG00000011483 | ENSGALG00000011740 | ENSGALG00000011306 | ENSGALG00000012522 | ENSGALG00000011306        | ENSGALG00000010614      |
| ENSGALG00000015602 | ENSGALG00000012612 | ENSGALG00000012612   | ENSGALG00000011740 | ENSGALG00000011715 | ENSGALG00000012211 | ENSGALG00000011475 | ENSGALG00000012541 | ENSGALG00000011475        | ENSGALG00000011086      |
| ENSGALG00000015617 | ENSGALG00000012783 | ENSGALG00000013069   | ENSGALG00000012211 | ENSGALG00000011740 | ENSGALG00000012229 | ENSGALG00000011483 | ENSGALG00000012612 | ENSGALG00000011715        | ENSGALG00000011274      |
| ENSGALG00000015917 | ENSGALG00000013414 | ENSGALG00000013414   | ENSGALG00000012229 | ENSGALG00000011991 | ENSGALG00000012541 | ENSGALG00000011715 | ENSGALG00000012783 | ENSGALG00000011740        | ENSGALG00000011290      |
| ENSGALG00000016127 | ENSGALG00000013990 | ENSGALG00000013990   | ENSGALG00000012541 | ENSGALG00000012211 | ENSGALG00000012612 | ENSGALG00000011740 | ENSGALG00000013414 | ENSGALG00000011991        | ENSGALG00000011306      |
| ENSGALG00000017299 | ENSGALG00000014432 | ENSGALG00000014432   | ENSGALG00000012612 | ENSGALG00000012229 | ENSGALG00000012783 | ENSGALG00000011991 | ENSGALG00000013990 | ENSGALG00000012211        | ENSGALG00000011475      |
| ENSGALG00000025842 | ENSGALG00000014442 | ENSGALG00000014442   | ENSGALG00000012783 | ENSGALG00000012541 | ENSGALG00000013414 | ENSGALG00000012211 | ENSGALG00000014432 | ENSGALG00000012229        | ENSGALG00000011740      |
| ENSGALG00000026300 | ENSGALG00000014463 | ENSGALG00000014463   | ENSGALG00000013414 | ENSGALG00000012783 | ENSGALG00000013537 | ENSGALG00000012229 | ENSGALG00000014442 | ENSGALG00000012541        | ENSGALG00000011991      |
| ENSGALG00000026383 | ENSGALG00000014526 | ENSGALG00000014526   | ENSGALG00000013537 | ENSGALG00000013414 | ENSGALG00000013990 | ENSGALG00000012541 | ENSGALG00000014463 | ENSGALG00000012783        | ENSGALG00000012229      |
| ENSGALG00000026490 | ENSGALG00000014848 | ENSGALG00000014848   | ENSGALG00000013990 | ENSGALG00000013537 | ENSGALG00000014432 | ENSGALG00000012712 | ENSGALG00000014526 | ENSGALG00000013414        | ENSGALG00000012541      |
| ENSGALG00000026970 | ENSGALG00000015018 | ENSGALG00000015018   | ENSGALG00000014432 | ENSGALG00000013990 | ENSGALG00000014442 | ENSGALG00000012783 | ENSGALG00000014848 | ENSGALG00000013537        | ENSGALG00000012783      |

*Continued on next page*

**Supplementary Table 4** (*continued*) The top 1% highly expressed genes at each skeletal muscle

| Extraocular        | Longissimus dorsi  | Pectoralis thoracica | Quadratus lumborum | Quadriceps         | Tibialis anterior  | Gastrocnemius      | Soleus             | Extensor digitorum longus | Flexor digitorum brevis |
|--------------------|--------------------|----------------------|--------------------|--------------------|--------------------|--------------------|--------------------|---------------------------|-------------------------|
| ENSGALG00000026978 | ENSGALG00000015082 | ENSGALG00000015082   | ENSGALG00000014442 | ENSGALG00000014432 | ENSGALG00000014463 | ENSGALG00000013414 | ENSGALG00000015018 | ENSGALG00000013990        | ENSGALG00000013414      |
| ENSGALG00000027035 | ENSGALG00000015339 | ENSGALG00000015195   | ENSGALG00000014463 | ENSGALG00000014442 | ENSGALG00000014526 | ENSGALG00000013537 | ENSGALG00000015082 | ENSGALG00000014432        | ENSGALG00000013537      |
| ENSGALG00000027142 | ENSGALG00000015372 | ENSGALG00000015339   | ENSGALG00000014526 | ENSGALG00000014463 | ENSGALG00000014848 | ENSGALG00000013990 | ENSGALG00000015339 | ENSGALG00000014442        | ENSGALG00000013990      |
| ENSGALG00000027323 | ENSGALG00000015602 | ENSGALG00000015372   | ENSGALG00000014833 | ENSGALG00000014526 | ENSGALG00000015018 | ENSGALG00000014432 | ENSGALG00000015372 | ENSGALG00000014463        | ENSGALG00000014432      |
| ENSGALG00000027583 | ENSGALG00000015617 | ENSGALG00000015602   | ENSGALG00000015018 | ENSGALG00000014833 | ENSGALG00000015082 | ENSGALG00000014442 | ENSGALG00000015602 | ENSGALG00000014526        | ENSGALG00000014442      |
| ENSGALG00000027963 | ENSGALG00000015917 | ENSGALG00000015617   | ENSGALG00000015082 | ENSGALG00000014848 | ENSGALG00000015195 | ENSGALG00000014463 | ENSGALG00000015617 | ENSGALG00000014833        | ENSGALG00000014463      |
| ENSGALG00000028520 | ENSGALG00000016127 | ENSGALG00000015917   | ENSGALG00000015195 | ENSGALG00000015018 | ENSGALG00000015339 | ENSGALG00000014526 | ENSGALG00000015917 | ENSGALG00000015018        | ENSGALG00000014833      |
| ENSGALG00000028537 | ENSGALG00000016342 | ENSGALG00000016127   | ENSGALG00000015339 | ENSGALG00000015082 | ENSGALG00000015372 | ENSGALG00000014833 | ENSGALG00000016127 | ENSGALG00000015082        | ENSGALG00000015018      |
| ENSGALG00000028872 | ENSGALG00000016954 | ENSGALG00000016232   | ENSGALG00000015372 | ENSGALG00000015195 | ENSGALG00000015602 | ENSGALG00000015018 | ENSGALG00000016342 | ENSGALG00000015195        | ENSGALG00000015082      |
| ENSGALG00000029500 | ENSGALG00000017168 | ENSGALG00000016342   | ENSGALG00000015602 | ENSGALG00000015339 | ENSGALG00000015617 | ENSGALG00000015082 | ENSGALG00000017168 | ENSGALG00000015339        | ENSGALG00000015195      |
| ENSGALG00000029660 | ENSGALG00000017299 | ENSGALG00000016954   | ENSGALG00000015617 | ENSGALG00000015372 | ENSGALG00000015917 | ENSGALG00000015195 | ENSGALG00000017299 | ENSGALG00000015372        | ENSGALG00000015339      |
| ENSGALG00000029837 | ENSGALG00000023819 | ENSGALG00000017168   | ENSGALG00000015917 | ENSGALG00000015602 | ENSGALG00000016127 | ENSGALG00000015339 | ENSGALG00000017380 | ENSGALG00000015617        | ENSGALG00000015372      |
| ENSGALG00000030436 | ENSGALG00000023834 | ENSGALG00000017299   | ENSGALG00000016127 | ENSGALG00000015617 | ENSGALG00000016232 | ENSGALG00000015372 | ENSGALG00000019157 | ENSGALG00000015917        | ENSGALG00000015617      |

*Continued on next page*

**Supplementary Table 4** (*continued*) The top 1% highly expressed genes at each skeletal muscle

| Extraocular        | Longissimus dorsi  | Pectoralis thoracica | Quadratus lumborum | Quadriceps         | Tibialis anterior  | Gastrocnemius      | Soleus             | Extensor digitorum longus | Flexor digitorum brevis |
|--------------------|--------------------|----------------------|--------------------|--------------------|--------------------|--------------------|--------------------|---------------------------|-------------------------|
| ENSGALG00000030878 | ENSGALG00000025842 | ENSGALG00000023294   | ENSGALG00000016954 | ENSGALG00000015917 | ENSGALG00000016342 | ENSGALG00000015602 | ENSGALG00000025842 | ENSGALG00000016127        | ENSGALG00000015917      |
| ENSGALG00000030886 | ENSGALG00000026077 | ENSGALG00000023819   | ENSGALG00000017168 | ENSGALG00000016127 | ENSGALG00000017168 | ENSGALG00000015617 | ENSGALG00000026077 | ENSGALG00000016826        | ENSGALG00000016127      |
| ENSGALG00000031496 | ENSGALG00000026300 | ENSGALG00000026077   | ENSGALG00000017299 | ENSGALG00000017168 | ENSGALG00000017299 | ENSGALG00000015917 | ENSGALG00000026300 | ENSGALG00000016954        | ENSGALG00000016232      |
| ENSGALG00000032002 | ENSGALG00000026449 | ENSGALG00000026300   | ENSGALG00000023819 | ENSGALG00000017299 | ENSGALG00000019157 | ENSGALG00000016127 | ENSGALG00000026383 | ENSGALG00000017168        | ENSGALG00000016775      |
| ENSGALG00000032079 | ENSGALG00000026490 | ENSGALG00000026383   | ENSGALG00000025842 | ENSGALG00000017380 | ENSGALG00000023819 | ENSGALG00000016351 | ENSGALG00000026490 | ENSGALG00000017299        | ENSGALG00000017168      |
| ENSGALG00000032142 | ENSGALG00000026553 | ENSGALG00000026449   | ENSGALG00000026300 | ENSGALG00000019157 | ENSGALG00000025842 | ENSGALG00000017168 | ENSGALG00000026553 | ENSGALG00000019157        | ENSGALG00000017299      |
| ENSGALG00000032456 | ENSGALG00000027035 | ENSGALG00000026490   | ENSGALG00000026383 | ENSGALG00000025842 | ENSGALG00000026300 | ENSGALG00000017299 | ENSGALG00000027035 | ENSGALG00000023819        | ENSGALG00000017330      |
| ENSGALG00000032465 | ENSGALG00000027583 | ENSGALG00000026978   | ENSGALG00000026490 | ENSGALG00000025999 | ENSGALG00000026383 | ENSGALG00000017380 | ENSGALG00000027323 | ENSGALG00000025842        | ENSGALG00000019157      |
| ENSGALG00000032595 | ENSGALG00000027771 | ENSGALG00000027035   | ENSGALG00000026978 | ENSGALG00000026300 | ENSGALG00000026490 | ENSGALG00000019157 | ENSGALG00000027583 | ENSGALG00000026300        | ENSGALG00000023819      |
| ENSGALG00000033446 | ENSGALG00000027963 | ENSGALG00000027142   | ENSGALG00000027035 | ENSGALG00000026383 | ENSGALG00000027035 | ENSGALG00000023772 | ENSGALG00000027771 | ENSGALG00000026383        | ENSGALG00000025842      |
| ENSGALG00000034083 | ENSGALG00000028537 | ENSGALG00000027771   | ENSGALG00000027583 | ENSGALG00000026490 | ENSGALG00000027583 | ENSGALG00000023819 | ENSGALG00000027963 | ENSGALG00000026490        | ENSGALG00000026300      |
| ENSGALG00000035079 | ENSGALG00000028612 | ENSGALG00000027872   | ENSGALG00000027771 | ENSGALG00000027035 | ENSGALG00000027771 | ENSGALG00000025842 | ENSGALG00000028537 | ENSGALG00000026978        | ENSGALG00000026383      |
| ENSGALG00000035252 | ENSGALG00000028872 | ENSGALG00000027891   | ENSGALG00000027963 | ENSGALG00000027583 | ENSGALG00000027963 | ENSGALG00000026300 | ENSGALG00000028612 | ENSGALG00000027035        | ENSGALG00000026490      |

*Continued on next page*

**Supplementary Table 4** (*continued*) The top 1% highly expressed genes at each skeletal muscle

| Extraocular        | Longissimus dorsi  | Pectoralis thoracica | Quadratus lumborum | Quadriceps         | Tibialis anterior  | Gastrocnemius      | Soleus             | Extensor digitorum longus | Flexor digitorum brevis |
|--------------------|--------------------|----------------------|--------------------|--------------------|--------------------|--------------------|--------------------|---------------------------|-------------------------|
| ENSGALG00000035334 | ENSGALG00000029150 | ENSGALG00000028537   | ENSGALG00000028537 | ENSGALG00000027771 | ENSGALG00000028520 | ENSGALG00000026383 | ENSGALG00000028872 | ENSGALG00000027583        | ENSGALG00000026978      |
| ENSGALG00000035506 | ENSGALG00000029500 | ENSGALG00000028872   | ENSGALG00000028612 | ENSGALG00000027963 | ENSGALG00000028537 | ENSGALG00000026490 | ENSGALG00000029150 | ENSGALG00000027771        | ENSGALG00000027035      |
| ENSGALG00000035996 | ENSGALG00000029585 | ENSGALG00000029150   | ENSGALG00000028872 | ENSGALG00000028537 | ENSGALG00000028612 | ENSGALG00000026978 | ENSGALG00000029500 | ENSGALG00000027891        | ENSGALG00000027142      |
| ENSGALG00000036229 | ENSGALG00000029606 | ENSGALG00000029500   | ENSGALG00000029150 | ENSGALG00000028612 | ENSGALG00000028872 | ENSGALG00000027035 | ENSGALG00000029585 | ENSGALG00000027963        | ENSGALG00000027583      |
| ENSGALG00000036774 | ENSGALG00000029837 | ENSGALG00000029585   | ENSGALG00000029203 | ENSGALG00000028872 | ENSGALG00000029150 | ENSGALG00000027583 | ENSGALG00000029837 | ENSGALG00000028520        | ENSGALG00000027891      |
| ENSGALG00000036790 | ENSGALG00000030436 | ENSGALG00000029606   | ENSGALG00000029500 | ENSGALG00000029150 | ENSGALG00000029203 | ENSGALG00000027963 | ENSGALG00000030436 | ENSGALG00000028612        | ENSGALG00000027963      |
| ENSGALG00000036955 | ENSGALG00000030878 | ENSGALG00000029837   | ENSGALG00000029606 | ENSGALG00000029203 | ENSGALG00000029500 | ENSGALG00000028537 | ENSGALG00000030878 | ENSGALG00000028872        | ENSGALG00000028520      |
| ENSGALG00000037441 | ENSGALG00000031723 | ENSGALG00000030247   | ENSGALG00000029837 | ENSGALG00000029500 | ENSGALG00000029585 | ENSGALG00000028612 | ENSGALG00000031723 | ENSGALG00000029150        | ENSGALG00000028612      |
| ENSGALG00000037716 | ENSGALG00000031890 | ENSGALG00000030436   | ENSGALG00000030436 | ENSGALG00000029837 | ENSGALG00000029837 | ENSGALG00000028872 | ENSGALG00000031890 | ENSGALG00000029203        | ENSGALG00000028749      |
| ENSGALG00000037805 | ENSGALG00000032002 | ENSGALG00000030878   | ENSGALG00000030878 | ENSGALG00000030436 | ENSGALG00000030436 | ENSGALG00000029203 | ENSGALG00000032002 | ENSGALG00000029500        | ENSGALG00000028774      |
| ENSGALG00000038672 | ENSGALG00000032079 | ENSGALG00000031723   | ENSGALG00000030985 | ENSGALG00000030878 | ENSGALG00000030878 | ENSGALG00000029500 | ENSGALG00000032079 | ENSGALG00000029837        | ENSGALG00000028872      |
| ENSGALG00000040098 | ENSGALG00000032142 | ENSGALG00000031890   | ENSGALG00000031723 | ENSGALG00000030985 | ENSGALG00000031723 | ENSGALG00000029837 | ENSGALG00000032142 | ENSGALG00000030436        | ENSGALG00000029203      |
| ENSGALG00000041091 | ENSGALG00000032404 | ENSGALG00000032002   | ENSGALG00000031826 | ENSGALG00000031723 | ENSGALG00000031890 | ENSGALG00000030436 | ENSGALG00000032404 | ENSGALG00000030878        | ENSGALG00000029500      |

*Continued on next page*

**Supplementary Table 4** (*continued*) The top 1% highly expressed genes at each skeletal muscle

| Extraocular        | Longissimus dorsi  | Pectoralis thoracica | Quadratus lumborum | Quadriceps         | Tibialis anterior  | Gastrocnemius      | Soleus             | Extensor digitorum longus | Flexor digitorum brevis |
|--------------------|--------------------|----------------------|--------------------|--------------------|--------------------|--------------------|--------------------|---------------------------|-------------------------|
| ENSGALG00000041541 | ENSGALG00000032456 | ENSGALG00000032079   | ENSGALG00000031890 | ENSGALG00000031826 | ENSGALG00000032002 | ENSGALG00000030878 | ENSGALG00000032456 | ENSGALG00000031723        | ENSGALG00000029837      |
| ENSGALG00000041826 | ENSGALG00000032465 | ENSGALG00000032142   | ENSGALG00000032002 | ENSGALG00000031890 | ENSGALG00000032079 | ENSGALG00000030985 | ENSGALG00000032465 | ENSGALG00000031826        | ENSGALG00000030436      |
| ENSGALG00000042478 | ENSGALG00000033212 | ENSGALG00000032403   | ENSGALG00000032079 | ENSGALG00000032002 | ENSGALG00000032142 | ENSGALG00000031723 | ENSGALG00000033212 | ENSGALG00000031890        | ENSGALG00000030878      |
| ENSGALG00000042750 | ENSGALG00000033271 | ENSGALG00000032404   | ENSGALG00000032142 | ENSGALG00000032079 | ENSGALG00000032404 | ENSGALG00000031826 | ENSGALG00000033271 | ENSGALG00000032002        | ENSGALG00000031723      |
| ENSGALG00000043064 | ENSGALG00000033446 | ENSGALG00000032456   | ENSGALG00000032404 | ENSGALG00000032142 | ENSGALG00000032456 | ENSGALG00000031890 | ENSGALG00000033446 | ENSGALG00000032079        | ENSGALG00000031890      |
| ENSGALG00000043234 | ENSGALG00000033700 | ENSGALG00000032465   | ENSGALG00000032456 | ENSGALG00000032404 | ENSGALG00000032465 | ENSGALG00000032002 | ENSGALG00000033884 | ENSGALG00000032142        | ENSGALG00000032002      |
| ENSGALG00000043379 | ENSGALG00000033884 | ENSGALG00000033212   | ENSGALG00000032465 | ENSGALG00000032456 | ENSGALG00000033212 | ENSGALG00000032079 | ENSGALG00000034083 | ENSGALG00000032404        | ENSGALG00000032079      |
| ENSGALG00000043768 | ENSGALG00000034083 | ENSGALG00000033271   | ENSGALG00000033212 | ENSGALG00000032465 | ENSGALG00000033271 | ENSGALG00000032142 | ENSGALG00000035079 | ENSGALG00000032456        | ENSGALG00000032142      |
| ENSGALG00000045362 | ENSGALG00000034615 | ENSGALG00000033446   | ENSGALG00000033271 | ENSGALG00000032595 | ENSGALG00000033446 | ENSGALG00000032287 | ENSGALG00000035252 | ENSGALG00000032465        | ENSGALG00000032404      |
| ENSGALG00000046937 | ENSGALG00000035079 | ENSGALG00000033884   | ENSGALG00000033446 | ENSGALG00000033212 | ENSGALG00000033884 | ENSGALG00000032456 | ENSGALG00000035334 | ENSGALG00000033212        | ENSGALG00000032456      |
| ENSGALG00000047114 | ENSGALG00000035252 | ENSGALG00000034083   | ENSGALG00000033700 | ENSGALG00000033271 | ENSGALG00000034083 | ENSGALG00000032465 | ENSGALG00000035506 | ENSGALG00000033271        | ENSGALG00000032465      |
| ENSGALG00000047227 | ENSGALG00000035334 | ENSGALG00000035079   | ENSGALG00000034083 | ENSGALG00000033446 | ENSGALG00000035079 | ENSGALG00000033212 | ENSGALG00000035584 | ENSGALG00000033446        | ENSGALG00000034083      |
| ENSGALG00000047395 | ENSGALG00000035506 | ENSGALG00000035252   | ENSGALG00000035079 | ENSGALG00000033700 | ENSGALG00000035252 | ENSGALG00000033446 | ENSGALG00000035996 | ENSGALG00000034083        | ENSGALG00000035079      |

*Continued on next page*

**Supplementary Table 4** (*continued*) The top 1% highly expressed genes at each skeletal muscle

| <b>Extraocular</b> | <b>Longissimus dorsi</b> | <b>Pectoralis thoracica</b> | <b>Quadratus lumborum</b> | <b>Quadriceps</b>  | <b>Tibialis anterior</b> | <b>Gastrocnemius</b> | <b>Soleus</b>      | <b>Extensor digitorum longus</b> | <b>Flexor digitorum brevis</b> |
|--------------------|--------------------------|-----------------------------|---------------------------|--------------------|--------------------------|----------------------|--------------------|----------------------------------|--------------------------------|
| ENSGALG00000047425 | ENSGALG00000035584       | ENSGALG00000035334          | ENSGALG00000035252        | ENSGALG00000034083 | ENSGALG00000035334       | ENSGALG00000033700   | ENSGALG00000036229 | ENSGALG00000035079               | ENSGALG00000035252             |
| ENSGALG00000047506 | ENSGALG00000035996       | ENSGALG00000035506          | ENSGALG00000035334        | ENSGALG00000035079 | ENSGALG00000035506       | ENSGALG00000034083   | ENSGALG00000036774 | ENSGALG00000035252               | ENSGALG00000035334             |
| ENSGALG00000047890 | ENSGALG00000036229       | ENSGALG00000035996          | ENSGALG00000035506        | ENSGALG00000035252 | ENSGALG00000035584       | ENSGALG00000035079   | ENSGALG00000036790 | ENSGALG00000035334               | ENSGALG00000035506             |
| ENSGALG00000048310 | ENSGALG00000036774       | ENSGALG00000036229          | ENSGALG00000035584        | ENSGALG00000035334 | ENSGALG00000035996       | ENSGALG00000035252   | ENSGALG00000036955 | ENSGALG00000035506               | ENSGALG00000035584             |
| ENSGALG00000048383 | ENSGALG00000036790       | ENSGALG00000036774          | ENSGALG00000035996        | ENSGALG00000035506 | ENSGALG00000036229       | ENSGALG00000035334   | ENSGALG00000037050 | ENSGALG00000035584               | ENSGALG00000035996             |
| ENSGALG00000048612 | ENSGALG00000036955       | ENSGALG00000036790          | ENSGALG00000036229        | ENSGALG00000035836 | ENSGALG00000036774       | ENSGALG00000035506   | ENSGALG00000037441 | ENSGALG00000035996               | ENSGALG00000036229             |
| ENSGALG00000048623 | ENSGALG00000037441       | ENSGALG00000036955          | ENSGALG00000036774        | ENSGALG00000035996 | ENSGALG00000036790       | ENSGALG00000035584   | ENSGALG00000037716 | ENSGALG00000036229               | ENSGALG00000036774             |
| ENSGALG00000048682 | ENSGALG00000037716       | ENSGALG00000037441          | ENSGALG00000036790        | ENSGALG00000036229 | ENSGALG00000036955       | ENSGALG00000035836   | ENSGALG00000037805 | ENSGALG00000036774               | ENSGALG00000036790             |
| ENSGALG00000048761 | ENSGALG00000037805       | ENSGALG00000037716          | ENSGALG00000036955        | ENSGALG00000036774 | ENSGALG00000037050       | ENSGALG00000035996   | ENSGALG00000037864 | ENSGALG00000036790               | ENSGALG00000036955             |
| ENSGALG00000049118 | ENSGALG00000037864       | ENSGALG00000037805          | ENSGALG00000037050        | ENSGALG00000036790 | ENSGALG00000037441       | ENSGALG00000036229   | ENSGALG00000038672 | ENSGALG00000036955               | ENSGALG00000037050             |
| ENSGALG00000049267 | ENSGALG00000038672       | ENSGALG00000038672          | ENSGALG00000037441        | ENSGALG00000036955 | ENSGALG00000037716       | ENSGALG00000036774   | ENSGALG00000038813 | ENSGALG00000037441               | ENSGALG00000037441             |
| ENSGALG00000049412 | ENSGALG00000038813       | ENSGALG00000038813          | ENSGALG00000037716        | ENSGALG00000037050 | ENSGALG00000037805       | ENSGALG00000036790   | ENSGALG00000040098 | ENSGALG00000037716               | ENSGALG00000037716             |
| ENSGALG00000049450 | ENSGALG00000038884       | ENSGALG00000038884          | ENSGALG00000037805        | ENSGALG00000037441 | ENSGALG00000037864       | ENSGALG00000036955   | ENSGALG00000040969 | ENSGALG00000037805               | ENSGALG00000037805             |

*Continued on next page*



**Supplementary Table 4** (*continued*) The top 1% highly expressed genes at each skeletal muscle

| Extraocular        | Longissimus dorsi  | Pectoralis thoracica | Quadratus lumborum | Quadriceps         | Tibialis anterior  | Gastrocnemius      | Soleus             | Extensor digitorum longus | Flexor digitorum brevis |
|--------------------|--------------------|----------------------|--------------------|--------------------|--------------------|--------------------|--------------------|---------------------------|-------------------------|
| ENSGALG00000049716 | ENSGALG00000040098 | ENSGALG00000040098   | ENSGALG00000037864 | ENSGALG00000037716 | ENSGALG00000038672 | ENSGALG00000037050 | ENSGALG00000040995 | ENSGALG00000037864        | ENSGALG00000038672      |
| ENSGALG00000049726 | ENSGALG00000040969 | ENSGALG00000040969   | ENSGALG00000038672 | ENSGALG00000037805 | ENSGALG00000038813 | ENSGALG00000037441 | ENSGALG00000041091 | ENSGALG00000038672        | ENSGALG00000038813      |
| ENSGALG00000049865 | ENSGALG00000040995 | ENSGALG00000040995   | ENSGALG00000038813 | ENSGALG00000037880 | ENSGALG00000040098 | ENSGALG00000037716 | ENSGALG00000042257 | ENSGALG00000038813        | ENSGALG00000039216      |
| ENSGALG00000049938 | ENSGALG00000041091 | ENSGALG00000041091   | ENSGALG00000040098 | ENSGALG00000038672 | ENSGALG00000040969 | ENSGALG00000037805 | ENSGALG00000042478 | ENSGALG00000039977        | ENSGALG00000040098      |
| ENSGALG00000050278 | ENSGALG00000042257 | ENSGALG00000042478   | ENSGALG00000040995 | ENSGALG00000040098 | ENSGALG00000040995 | ENSGALG00000037880 | ENSGALG00000042750 | ENSGALG00000040098        | ENSGALG00000041091      |
| ENSGALG00000050376 | ENSGALG00000042478 | ENSGALG00000042750   | ENSGALG00000041091 | ENSGALG00000040995 | ENSGALG00000041091 | ENSGALG00000038672 | ENSGALG00000043379 | ENSGALG00000040995        | ENSGALG00000041555      |
| ENSGALG00000050477 | ENSGALG00000042750 | ENSGALG00000043379   | ENSGALG00000042257 | ENSGALG00000041091 | ENSGALG00000042257 | ENSGALG00000038813 | ENSGALG00000043768 | ENSGALG00000041091        | ENSGALG00000041826      |
| ENSGALG00000050515 | ENSGALG00000043379 | ENSGALG00000043768   | ENSGALG00000042478 | ENSGALG00000042257 | ENSGALG00000042478 | ENSGALG00000040098 | ENSGALG00000044125 | ENSGALG00000041555        | ENSGALG00000042478      |
| ENSGALG00000051082 | ENSGALG00000043768 | ENSGALG00000044125   | ENSGALG00000042750 | ENSGALG00000042478 | ENSGALG00000042750 | ENSGALG00000041091 | ENSGALG00000045362 | ENSGALG00000042478        | ENSGALG00000042750      |
| ENSGALG00000051119 | ENSGALG00000044125 | ENSGALG00000045362   | ENSGALG00000043379 | ENSGALG00000042750 | ENSGALG00000043379 | ENSGALG00000042478 | ENSGALG00000046828 | ENSGALG00000042750        | ENSGALG00000043379      |
| ENSGALG00000051266 | ENSGALG00000045362 | ENSGALG00000046828   | ENSGALG00000043768 | ENSGALG00000043379 | ENSGALG00000043768 | ENSGALG00000042750 | ENSGALG00000047359 | ENSGALG00000043379        | ENSGALG00000043768      |
| ENSGALG00000051509 | ENSGALG00000046828 | ENSGALG00000047425   | ENSGALG00000044125 | ENSGALG00000043768 | ENSGALG00000045362 | ENSGALG00000043379 | ENSGALG00000047425 | ENSGALG00000043768        | ENSGALG00000045362      |
| ENSGALG00000051517 | ENSGALG00000047359 | ENSGALG00000048064   | ENSGALG00000045362 | ENSGALG00000045362 | ENSGALG00000046828 | ENSGALG00000043768 | ENSGALG00000048064 | ENSGALG00000045362        | ENSGALG00000046828      |

*Continued on next page*

**Supplementary Table 4** (*continued*) The top 1% highly expressed genes at each skeletal muscle

| Extraocular        | Longissimus dorsi  | Pectoralis thoracica | Quadratus lumborum | Quadriceps         | Tibialis anterior  | Gastrocnemius      | Soleus             | Extensor digitorum longus | Flexor digitorum brevis |
|--------------------|--------------------|----------------------|--------------------|--------------------|--------------------|--------------------|--------------------|---------------------------|-------------------------|
| ENSGALG00000051617 | ENSGALG00000047425 | ENSGALG00000048310   | ENSGALG00000046828 | ENSGALG00000046828 | ENSGALG00000047425 | ENSGALG00000045362 | ENSGALG00000048310 | ENSGALG00000046828        | ENSGALG00000047425      |
| ENSGALG00000051870 | ENSGALG00000048064 | ENSGALG00000048546   | ENSGALG00000047425 | ENSGALG00000047425 | ENSGALG00000048064 | ENSGALG00000046828 | ENSGALG00000048546 | ENSGALG00000047425        | ENSGALG00000048064      |
| ENSGALG00000051946 | ENSGALG00000048310 | ENSGALG00000048612   | ENSGALG00000048064 | ENSGALG00000048064 | ENSGALG00000048310 | ENSGALG00000047425 | ENSGALG00000048612 | ENSGALG00000048064        | ENSGALG00000048310      |
| ENSGALG00000052142 | ENSGALG00000048546 | ENSGALG00000048682   | ENSGALG00000048310 | ENSGALG00000048310 | ENSGALG00000048546 | ENSGALG00000048064 | ENSGALG00000048682 | ENSGALG00000048310        | ENSGALG00000048612      |
| ENSGALG00000052338 | ENSGALG00000048612 | ENSGALG00000049412   | ENSGALG00000048546 | ENSGALG00000048546 | ENSGALG00000048612 | ENSGALG00000048310 | ENSGALG00000049412 | ENSGALG00000048612        | ENSGALG00000048682      |
| ENSGALG00000052797 | ENSGALG00000048682 | ENSGALG00000049538   | ENSGALG00000048612 | ENSGALG00000048612 | ENSGALG00000048682 | ENSGALG00000048612 | ENSGALG00000049865 | ENSGALG00000048682        | ENSGALG00000049412      |
| ENSGALG00000053046 | ENSGALG00000049412 | ENSGALG00000049865   | ENSGALG00000048682 | ENSGALG00000048682 | ENSGALG00000049412 | ENSGALG00000048682 | ENSGALG00000049891 | ENSGALG00000049412        | ENSGALG00000049450      |
| ENSGALG00000053246 | ENSGALG00000049865 | ENSGALG00000049891   | ENSGALG00000049412 | ENSGALG00000049412 | ENSGALG00000049865 | ENSGALG00000049412 | ENSGALG00000051517 | ENSGALG00000049865        | ENSGALG00000049865      |
| ENSGALG00000053477 | ENSGALG00000049891 | ENSGALG00000051517   | ENSGALG00000049865 | ENSGALG00000049865 | ENSGALG00000049891 | ENSGALG00000049865 | ENSGALG00000051870 | ENSGALG00000051082        | ENSGALG00000051082      |
| ENSGALG00000053705 | ENSGALG00000051517 | ENSGALG00000051598   | ENSGALG00000049891 | ENSGALG00000049891 | ENSGALG00000051517 | ENSGALG00000051152 | ENSGALG00000052338 | ENSGALG00000051517        | ENSGALG00000051517      |
| ENSGALG00000053794 | ENSGALG00000051870 | ENSGALG00000051870   | ENSGALG00000051517 | ENSGALG00000051517 | ENSGALG00000051870 | ENSGALG00000051517 | ENSGALG00000052797 | ENSGALG00000051598        | ENSGALG00000051598      |
| ENSGALG00000053991 | ENSGALG00000052338 | ENSGALG00000052338   | ENSGALG00000051870 | ENSGALG00000051870 | ENSGALG00000052338 | ENSGALG00000051870 | ENSGALG00000053046 | ENSGALG00000051870        | ENSGALG00000051870      |
| ENSGALG00000054033 | ENSGALG00000052797 | ENSGALG00000052797   | ENSGALG00000052338 | ENSGALG00000052338 | ENSGALG00000052797 | ENSGALG00000052338 | ENSGALG00000053055 | ENSGALG00000052338        | ENSGALG00000052338      |

*Continued on next page*

**Supplementary Table 4** (*continued*) The top 1% highly expressed genes at each skeletal muscle

| <b>Extraocular</b>     | <b>Longissimus dorsi</b> | <b>Pectoralis thoracica</b> | <b>Quadratus lumborum</b> | <b>Quadriceps</b>      | <b>Tibialis anterior</b> | <b>Gastrocnemius</b>   | <b>Soleus</b>          | <b>Extensor digitorum longus</b> | <b>Flexor digitorum brevis</b> |
|------------------------|--------------------------|-----------------------------|---------------------------|------------------------|--------------------------|------------------------|------------------------|----------------------------------|--------------------------------|
| ENSGALG000<br>00054060 | ENSGALG000<br>00053046   | ENSGALG000<br>00053046      | ENSGALG000<br>00052797    | ENSGALG000<br>00052797 | ENSGALG000<br>00053046   | ENSGALG000<br>00052797 | ENSGALG000<br>00053625 | ENSGALG000<br>00052797           | ENSGALG000<br>00052797         |
| ENSGALG000<br>00054189 | ENSGALG000<br>00053625   | ENSGALG000<br>00053991      | ENSGALG000<br>00053046    | ENSGALG000<br>00053046 | ENSGALG000<br>00053625   | ENSGALG000<br>00053046 | ENSGALG000<br>00053991 | ENSGALG000<br>00053046           | ENSGALG000<br>00053046         |
| ENSGALG000<br>00054874 | ENSGALG000<br>00053991   | ENSGALG000<br>00054033      | ENSGALG000<br>00053991    | ENSGALG000<br>00053991 | ENSGALG000<br>00053991   | ENSGALG000<br>00053991 | ENSGALG000<br>00054033 | ENSGALG000<br>00053991           | ENSGALG000<br>00053991         |
| ENSGALG000<br>00054951 | ENSGALG000<br>00054033   | ENSGALG000<br>00055094      | ENSGALG000<br>00054033    | ENSGALG000<br>00054033 | ENSGALG000<br>00054033   | ENSGALG000<br>00054033 | ENSGALG000<br>00055094 | ENSGALG000<br>00054033           | ENSGALG000<br>00054033         |
